# Supplementary material for: Assembly of oriented iron oxide and zeolite crystals via biopolymer films
Source: Royal Society of Chemistry journal article supplement (doi:10.1039/c2jm35068h), 2012-01-01
Supplement: c2jm35068h.pdf [file c2jm35068h.pdf]

## Electronic Supplementary Information

### Assembly of Oriented Iron Oxide and Zeolite Crystals via Biopolymer Films

Ming Zhou\*, Jonas Hedlund

Luleå University of Technology, Porsön Campus, SE-971 87 LULEÅ Sweden

E-mail: [ming.zhou@ltu.se](mailto:ming.zhou@ltu.se)

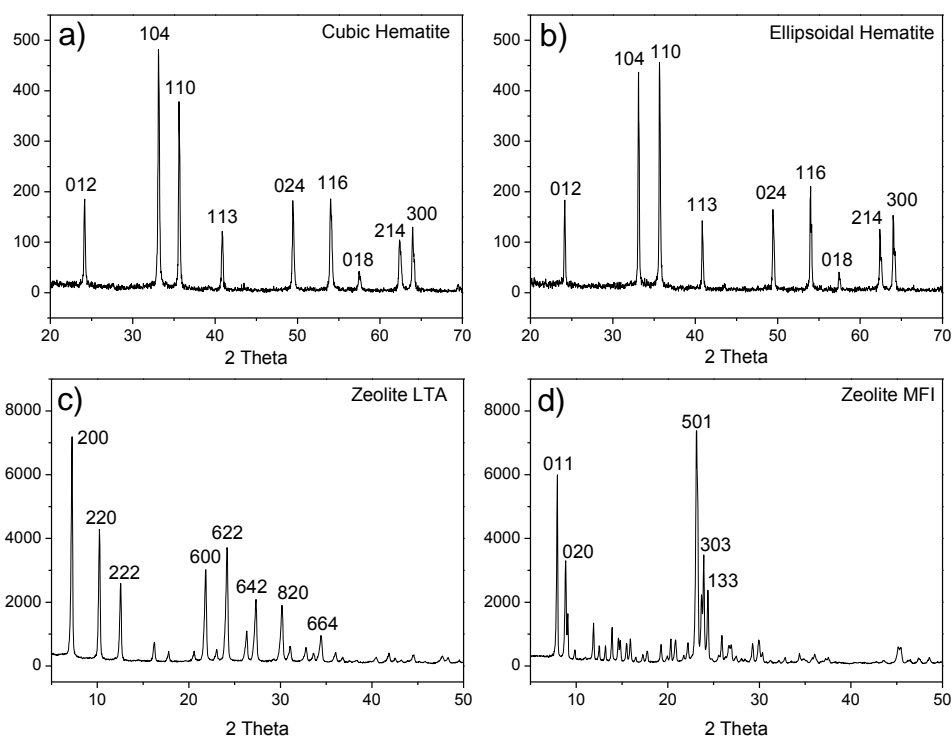

**Figure S1.** XRD patterns of randomly oriented powders of a) cubic hematite, b) ellipsoidal hematite, c) zeolite LTA and d) zeolite MFI.

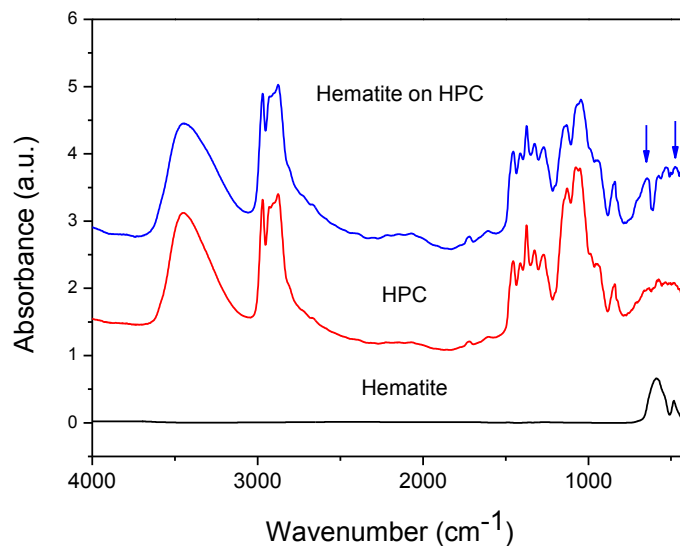

**Figure S2.** FT-IR traces in mid-infrared regions ( $400\text{-}4000\text{ cm}^{-1}$ ) for the hematite powder (black line), HPC polymer (red line) and oriented hematite monolayer on HPC film (blue line).

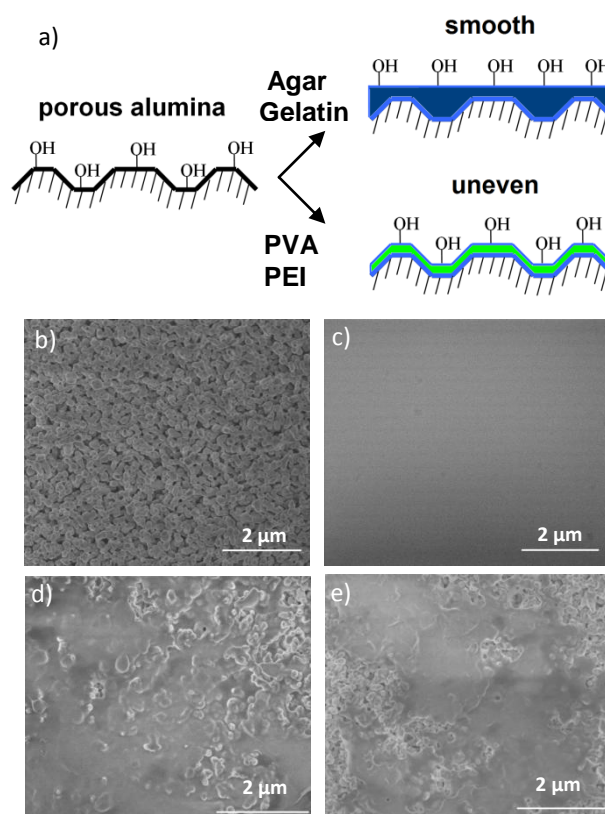

**Figure S3.** Schematic description of coated polymers with different drying feature on macroporous alumina surface (a), SEM images of bare alumina surface (b), and after it coated with agar film (c), PEI film (d) and PVA film (e) by spin coating.

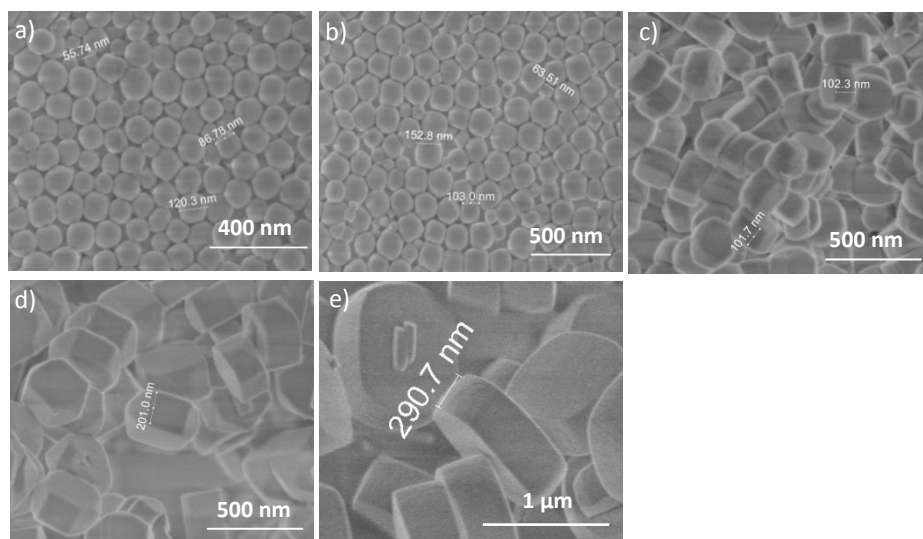

**Figure S4.** SEM images of LTA-1 crystals (a), LTA-2 crystals (b), MFI-1 crystals (c), MFI-2 crystals (d), MFI-3 crystals (e). The thickness or length of the particles are indicated in the images.

**Table S1.** Light interference from oriented zeolite monolayers.

| zeolite | $n_{\text{zeolite}}$ | Average thickness (d) <sup>§</sup> | Calculated ( $\lambda$ ) <sup>*</sup> | Observed color |
|---------|----------------------|------------------------------------|---------------------------------------|----------------|
| LTA-1   | 1.45                 | 87 nm                              | 505 nm                                | cyan           |
| LTA-2   | 1.45                 | 103 nm                             | 596 nm                                | orange         |
| MFI-1   | 1.39                 | 102 nm                             | 567 nm                                | yellow         |
| MFI-2   | 1.39                 | 201 nm                             | 372 nm                                | violet         |
| MFI-3   | 1.39                 | 291 nm                             | 539 nm                                | green          |

<sup>§</sup> The average thickness was determined by SEM measurement of single crystal size as illustrated in Figure S4.

<sup>\*</sup> Calculated using the equation for positive interference:  $2nd\cos(\theta_2) = (m + 1/2)\lambda$ ,  $m$  is integer (-2, -1, 0, 1, 2...)
